# Supplementary material for: Analyzing cell mechanics in hematologic diseases with microfluidic biophysical flow cytometry
Source: Royal Society of Chemistry journal article supplement (doi:10.1039/b802931h), 2008-01-01
Supplement: b802931h.pdf [file b802931h.pdf]

Captions for Supplemental Movies:

Supplemental Movie 1. Typical movie captured during a biophysical flow cytometry experiment. In this movie, neutrophils are transiting through the network of parallel microchannels. Scalebar 50  $\mu\text{m}$ .

Supplemental Movie 2. Closeup of neutrophils transiting through the microchannels of the biophysical flow cytometer. This movie corresponds to Figure 2B-C. Scalebar 20  $\mu\text{m}$ .
